# Supplementary material for: Multifunctional hybrid nanoparticles based on sodium carboxymethylcellulose-graft-histidine and TPGS for enhanced effect of docetaxel
Source: Royal Society of Chemistry journal article supplement (doi:10.1039/c5ra05586e), 2015-01-01
Supplement: c5ra05586e1.pdf [file c5ra05586e1.pdf]

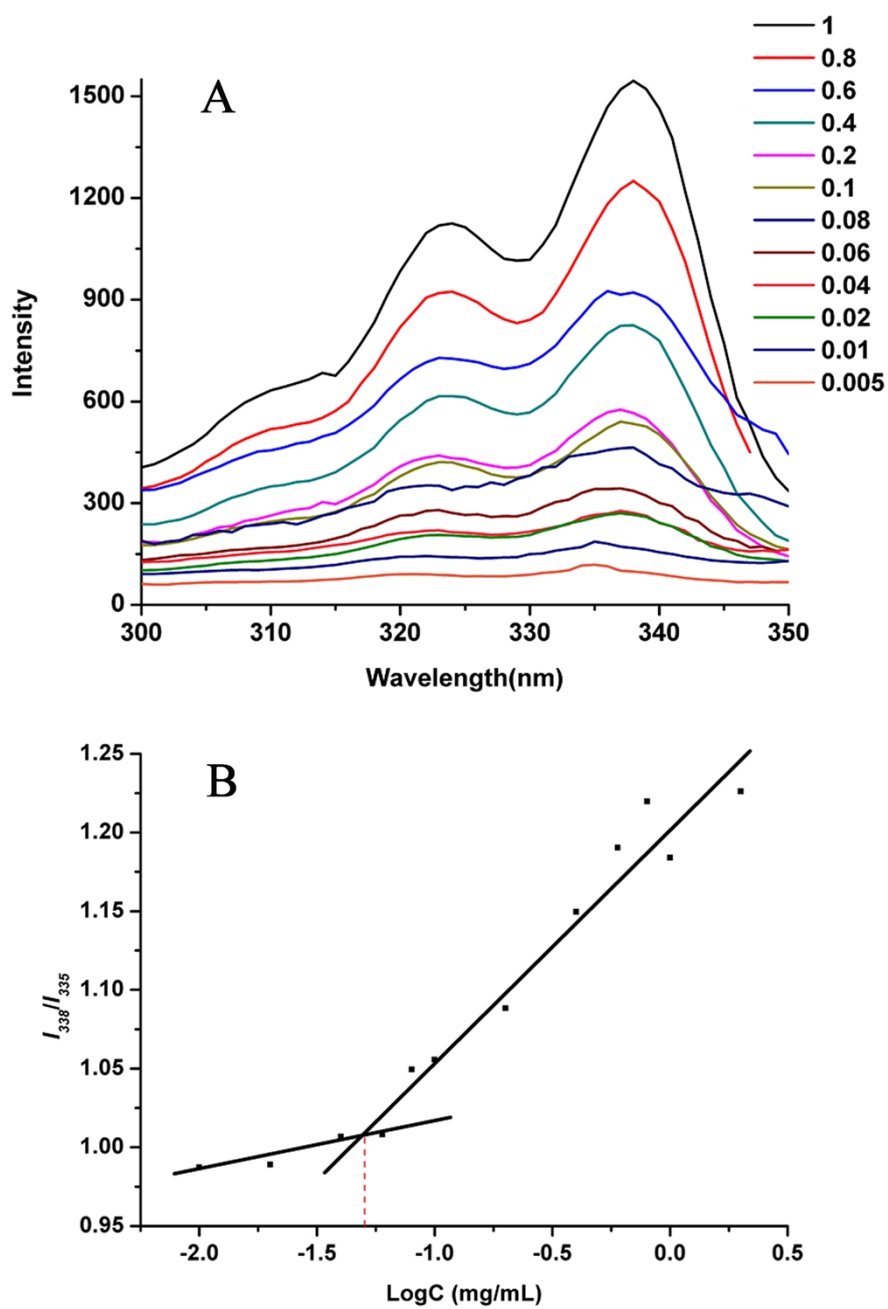

**Fig. S2** (A) Excitation spectra of pyrene in CMH copolymer solution with different concentrations (mg/mL). (B) The dependence of excitation fluorescence intensity ratio of pyrene ( $I_{338}/I_{335}$ ) on the logarithmic concentration of CMH copolymer.
